# Supplementary material for: Age-dependent co-dependency structure of biomarkers in the general population of the United States
Source: publisher site journal article supplement (doi:10.18632/aging.101842), 2019-02-28
Supplement: Supplementary file [file aging-v11i5-101842-supplementary-material-SD1.pdf]

**SUPPLEMENTARY FIGURE**

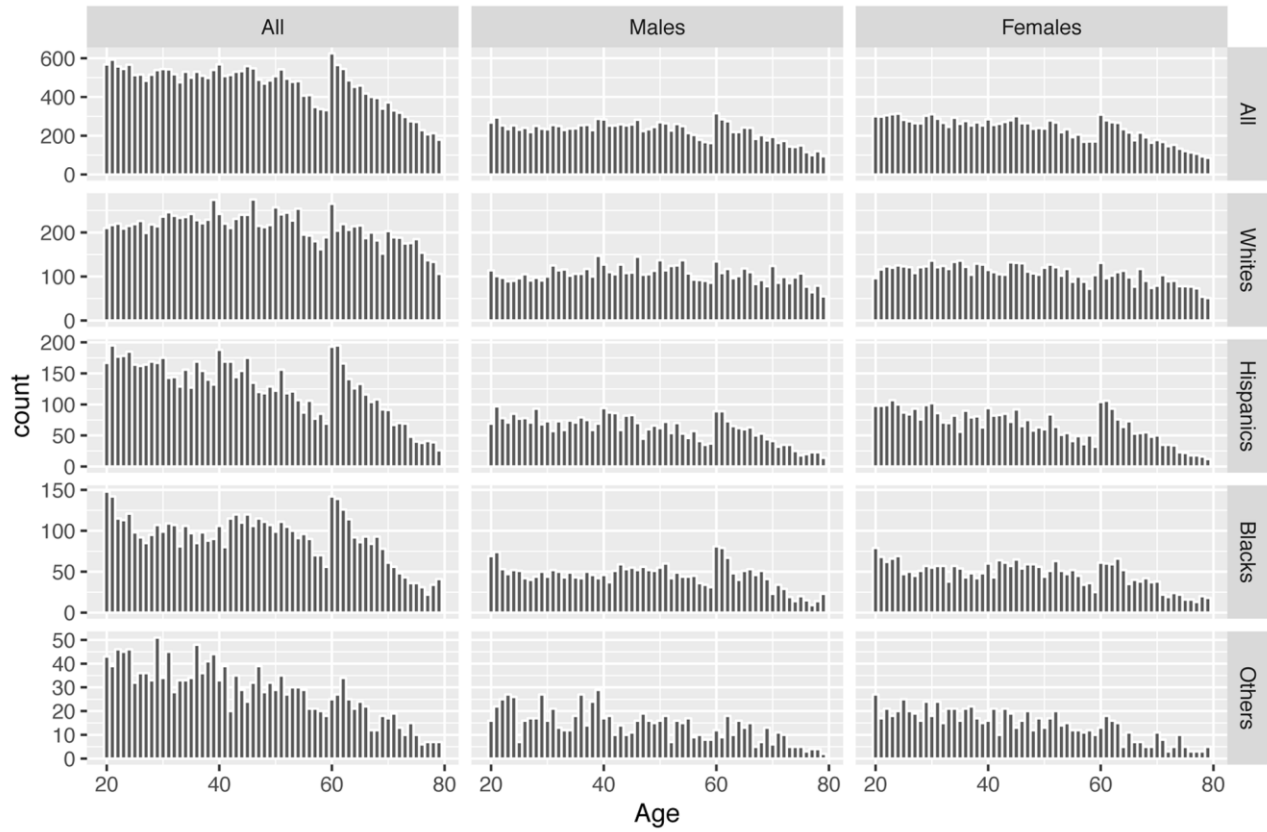

**Figure S1. Age distribution in different demographic subgroups.**
